# Supplementary material
Source: Research Square preprint supplement (doi:10.21203/rs.3.rs-9475817/v1)
Supplement: Supplementary file 1 [file 12dc350c56b64e7c8aeaff69.pdf]

# Supplementary Information

## S1 Dataset Statistics and Symmetry Analysis

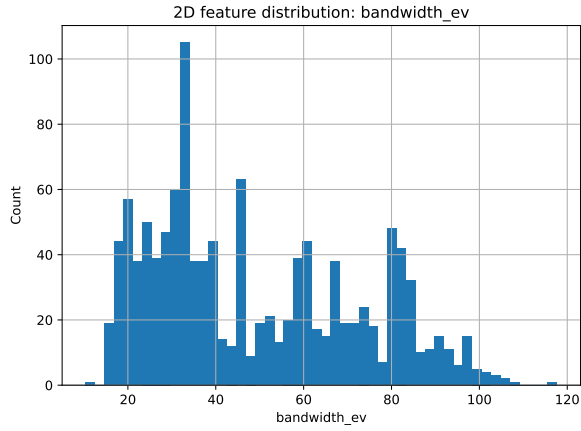

(a) 2D materials

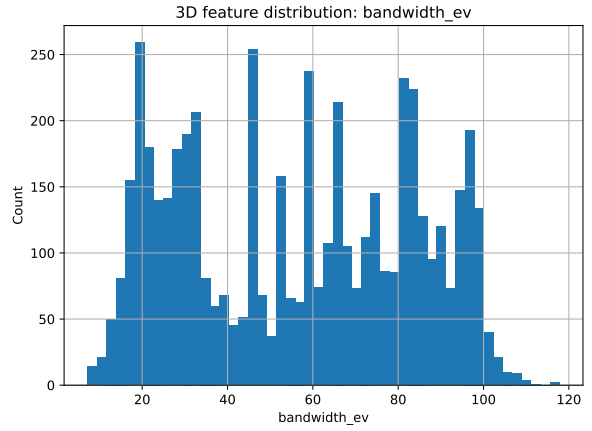

(b) 3D materials

Figure S1: Frequency distribution of bandwidth across the full (a) 2D and (b) 3D datasets.

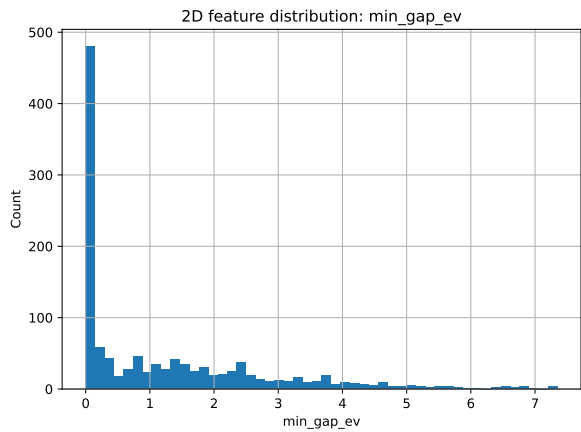

(a) 2D materials

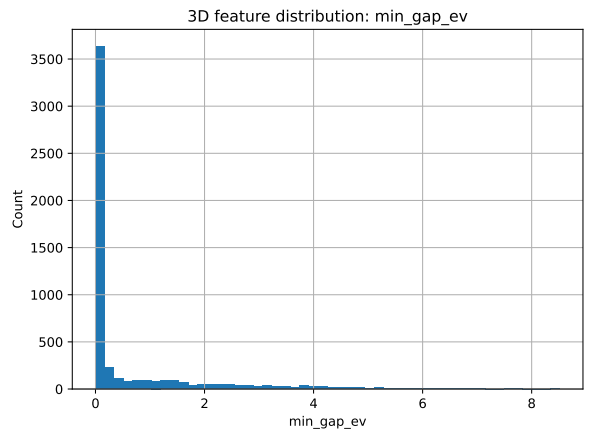

(b) 3D materials

Figure S2: Frequency distribution of minimum bandgap across the full (a) 2D and (b) 3D datasets.

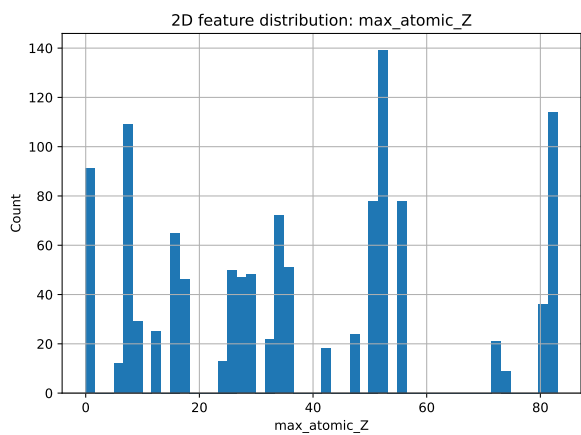

(a) 2D materials

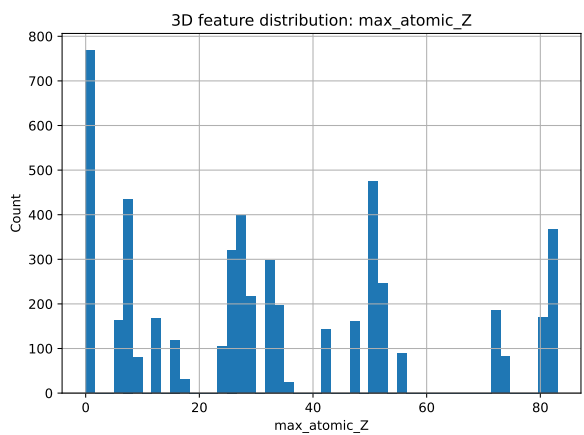

(b) 3D materials

Figure S3: Frequency distribution of maximum atomic number across the full (a) 2D and (b) 3D datasets.

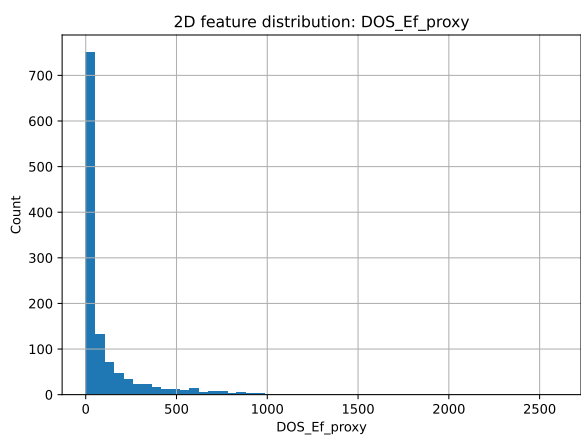

(a) 2D materials

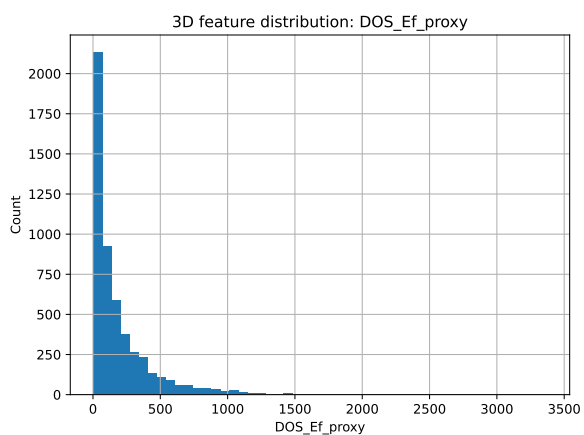

(b) 3D materials

Figure S4: Frequency distribution of DOS proxy across the full (a) 2D and (b) 3D datasets.

## S2 Baseline Tabular Models ROC Curves

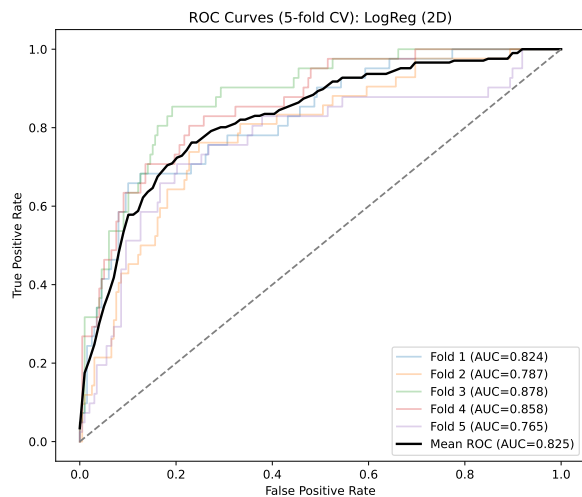

(a) 2D materials

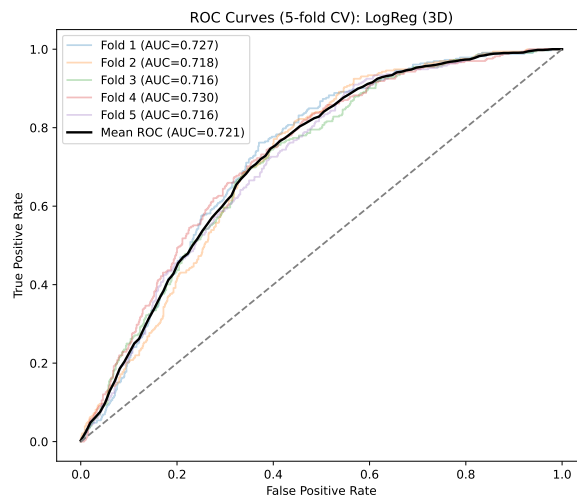

(b) 3D materials

Figure S5: ROC curves for Logistic Regression applied to (a) 2D and (b) 3D materials.

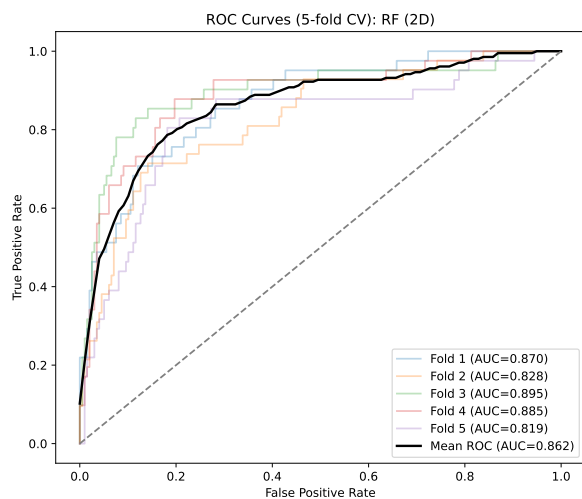

(a) 2D materials

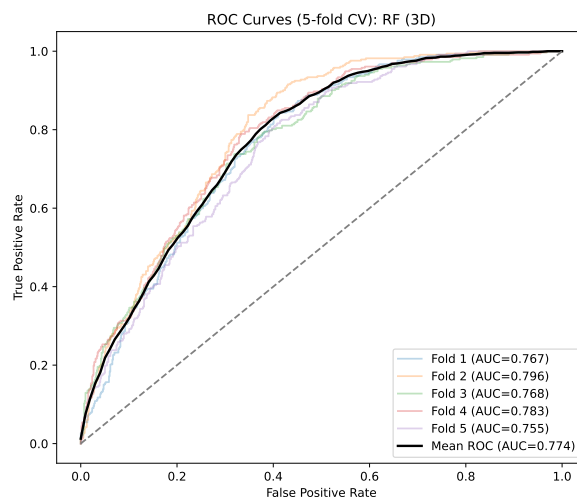

(b) 3D materials

Figure S6: ROC curves for Random Forest applied to (a) 2D and (b) 3D materials.

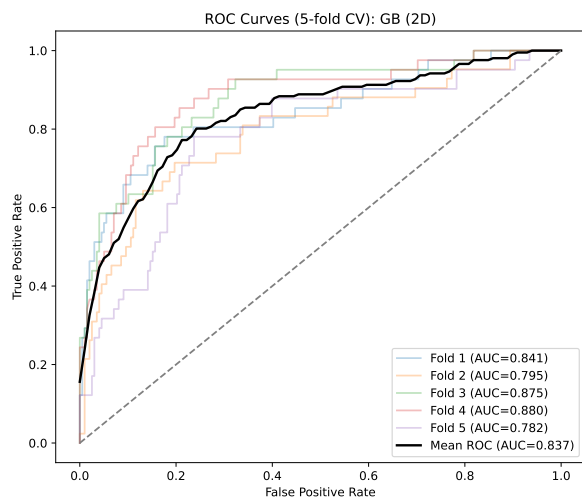

(a) 2D materials

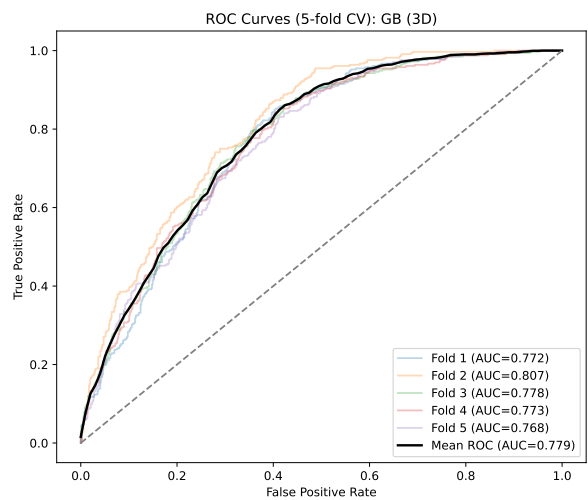

(b) 3D materials

Figure S7: ROC curves for Gradient Boosting applied to (a) 2D and (b) 3D materials.

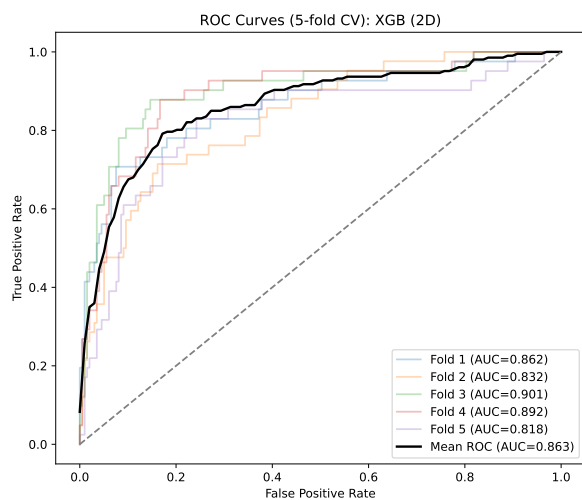

(a) 2D materials

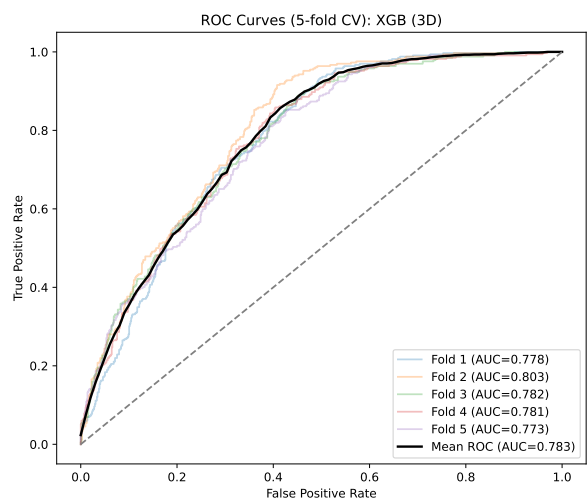

(b) 3D materials

Figure S8: ROC curves for XGBoost applied to (a) 2D and (b) 3D materials.

## S3 Graph Neural Network Models Performance

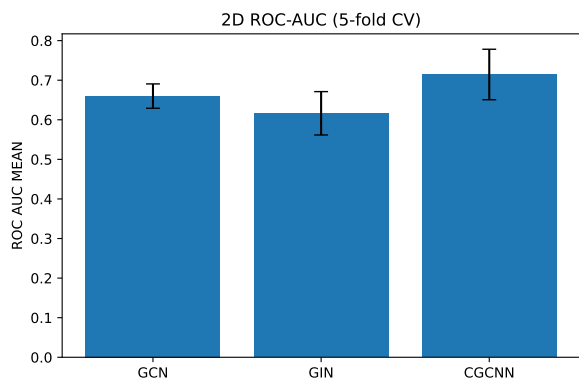

(a) 2D materials

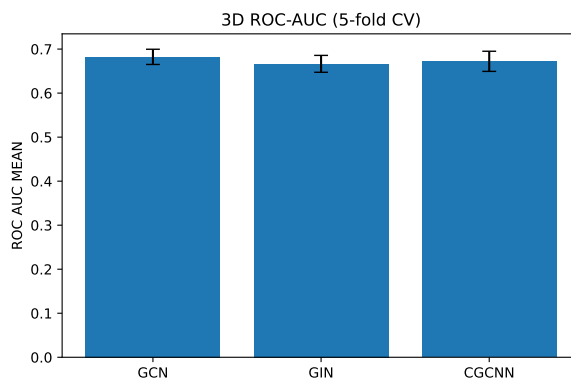

(b) 3D materials

Figure S9: ROC comparison (bar plots) for models trained on (a) 2D and (b) 3D crystal graphs.

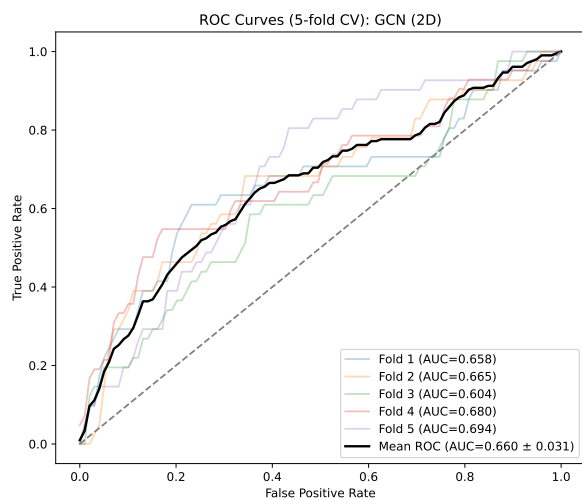

(a) 2D materials

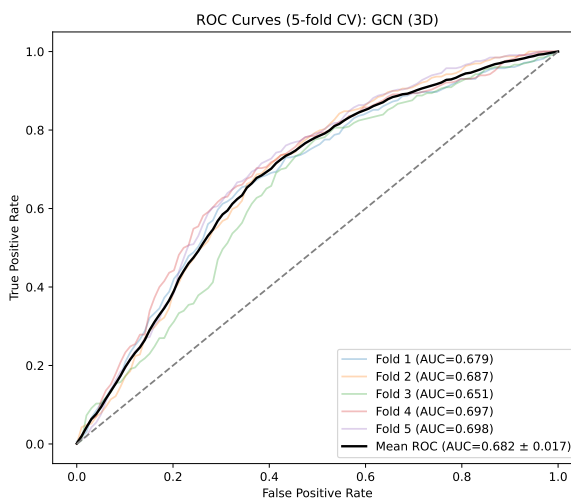

(b) 3D materials

Figure S10: ROC curves for the GCN model trained on (a) 2D and (b) 3D crystal graphs.

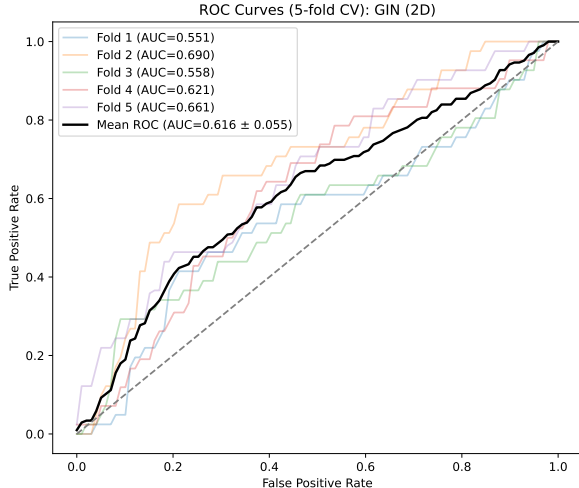

(a) 2D materials

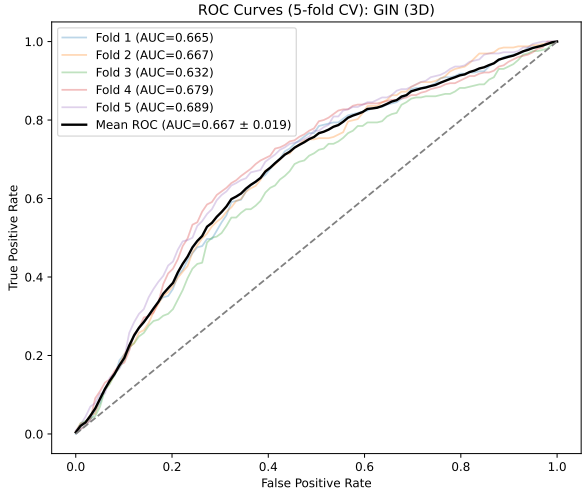

(b) 3D materials

Figure S11: ROC curves for the GIN model trained on (a) 2D and (b) 3D crystal graphs.

## S4 Definition of Inverse Design Scores

We define the probabilistic inverse design scores used to rank candidate materials and describe the spin orbit coupling proxy employed during chemical-space pruning. The framework combines composition and symmetry driven tabular models with structure aware crystal graph neural networks.

### S4.1 Tabular Inverse Probability $P_{\text{Tabular}}$

The tabular inverse probability  $P_{\text{Tabular}}$  estimates the likelihood that a material hosts a non trivial topological phase based exclusively on composition- and symmetry-derived descriptors. Separate LightGBM classifiers were trained for two-dimensional (2D) and three dimensional (3D) datasets. All electronic structure-derived quantities (e.g., band gaps, Fermi-level features, explicit topological invariants) were excluded to prevent information leakage.

For a standardized feature vector  $\mathbf{x} \in \mathbb{R}^d$ , the model learns a nonlinear decision function

$$f_{\text{Tab}}(\mathbf{x}) = \sum_{m=1}^M \gamma_m h_m(\mathbf{x}), \quad (1)$$

where  $h_m$  are decision trees and  $\gamma_m$  are learned weights. The output is mapped to a probability using the logistic sigmoid function:

$$P_{\text{Tabular}} = \sigma(f_{\text{Tab}}(\mathbf{x})) = \frac{1}{1 + e^{-f_{\text{Tab}}(\mathbf{x})}}. \quad (2)$$

This score captures chemically and symmetry driven trends associated with topological band inversion.

## S4.2 Graph Based Inverse Probability $P_{\text{CGCNN}}$

Crystal structures are represented as graphs  $G = (V, E)$ , where nodes correspond to atoms and edges encode interatomic connections within a fixed radial cutoff. Each atom is described by an 8-dimensional elemental feature vector. A Crystal Graph Convolutional Neural Network (CGCNN) updates node representations through successive message-passing layers, followed by global mean pooling to obtain a crystal level embedding  $\mathbf{h}_{\text{crystal}}$ . The final logit

$$z_{\text{CGCNN}} = W\mathbf{h}_{\text{crystal}} + b \quad (3)$$

is converted to a probability

$$P_{\text{CGCNN}} = \sigma(z_{\text{CGCNN}}). \quad (4)$$

Unlike  $P_{\text{Tabular}}$ , this score explicitly depends on atomic arrangement and local coordination environment, enabling refinement across crystallographic prototypes.

## S4.3 Joint Inverse Probability $P_{\text{Joint}}$

To combine complementary chemical and structural information, the final ranking score is defined as a fixed weighted fusion:

$$P_{\text{Joint}} = \alpha P_{\text{Tabular}} + (1 - \alpha) P_{\text{CGCNN}}, \quad (5)$$

with  $\alpha = 0.6$  throughout this work.

Materials are ranked according to  $P_{\text{Joint}}$  for inverse discovery and downstream validation.

## S4.4 SOC Proxy

To prioritize materials likely to exhibit strong relativistic effects, a spin orbit coupling (SOC) proxy was employed during chemical space reduction. The proxy is defined as

$$\text{SOC}_{\text{proxy}} = \langle Z^2 \rangle = \frac{1}{N_{\text{el}}} \sum_{i=1}^{N_{\text{el}}} Z_i^2, \quad (6)$$

where  $Z_i$  denotes the atomic number of element  $i$  in the composition and  $N_{\text{el}}$  is the number of distinct constituent elements.

This proxy reflects the leading-order atomic scaling of spin-orbit interaction strength with  $Z^2$  and was used exclusively for physics-informed pruning of the hypothetical chemical space prior to model scoring.

## S5 Supplementary Tables

Table S1: List of features used in tabular machine learning models.

| Feature category             | Features                                               |
|------------------------------|--------------------------------------------------------|
| Electronic structure proxies | bandwidth_ev, min_gap_ev, DOS_Ef_proxy, n_crossings_Ef |
| Chemical composition         | num_elements, max_atomic_Z, heavy_element_flag         |
| Crystallographic             | dim, centered, nat, ne, space_group_number             |
| Topological invariants       | nu0, nu1, nu2, nu3                                     |
| Derived descriptors          | dispersion_anisotropy, flat_band_ratio                 |

Table S2: Definitions of performance metrics used to evaluate tabular and graph-based machine learning models.

| <b>Metric</b>                          | <b>Definition and interpretation</b>                                                                                                                                                                                                                                                                                                                                         |
|----------------------------------------|------------------------------------------------------------------------------------------------------------------------------------------------------------------------------------------------------------------------------------------------------------------------------------------------------------------------------------------------------------------------------|
| ROC-AUC                                | Area under the receiver operating characteristic (ROC) curve, measuring the probability that a randomly chosen positive (topologically non-trivial) sample is ranked higher than a randomly chosen negative (trivial) sample. Values range from 0.5 (random guessing) to 1.0 (perfect discrimination).                                                                       |
| PR-AUC                                 | Area under the precision–recall (PR) curve, which emphasizes model performance on the positive class and is particularly informative for imbalanced datasets common in materials discovery tasks.                                                                                                                                                                            |
| Accuracy                               | Fraction of correctly classified samples among all samples. While intuitive, accuracy can be misleading for imbalanced datasets and is therefore reported alongside complementary metrics.                                                                                                                                                                                   |
| Precision                              | Fraction of predicted positive samples that are truly positive, defined as $TP/(TP + FP)$ . High precision indicates a low false-positive rate, important for minimizing wasted experimental or computational validation.                                                                                                                                                    |
| Recall                                 | Fraction of true positive samples correctly identified, defined as $TP/(TP + FN)$ . High recall reflects the model’s ability to recover known topological materials.                                                                                                                                                                                                         |
| F1-score                               | Harmonic mean of precision and recall, defined as $2(\text{Precision} \times \text{Recall})/(\text{Precision} + \text{Recall})$ . This metric balances false positives and false negatives in a single scalar quantity.                                                                                                                                                      |
| Matthews Correlation Coefficient (MCC) | Correlation coefficient between observed and predicted classifications, defined as $\text{MCC} = \frac{\text{TP} \cdot \text{TN} - \text{FP} \cdot \text{FN}}{\sqrt{(\text{TP} + \text{FP})(\text{TP} + \text{FN})(\text{TN} + \text{FP})(\text{TN} + \text{FN})}}$ MCC ranges from $-1$ (total disagreement) to $+1$ (perfect prediction) and is robust to class imbalance. |
| Pearson correlation ( $r$ )            | Linear correlation coefficient between predicted probabilities and true labels, quantifying the strength of linear association.                                                                                                                                                                                                                                              |
| Spearman correlation ( $\rho$ )        | Rank-based correlation coefficient assessing monotonic agreement between predicted scores and true labels, insensitive to non-linear scaling.                                                                                                                                                                                                                                |

Table S3: Top 100 inverse candidates ranked by joint probabilities

| S.No. | Formula                            | $P_{\text{Tabular}}$ | $P_{\text{CGCNN}}$ | $P_{\text{Joint}}$ |
|-------|------------------------------------|----------------------|--------------------|--------------------|
| 1     | CuAg <sub>2</sub> Sb               | 0.944045337          | 0.738165268        | 0.861693310        |
| 2     | Cu <sub>2</sub> Ag <sub>2</sub> Sb | 0.937373228          | 0.738165268        | 0.857690044        |
| 3     | AgBaBi                             | 0.898340823          | 0.794299030        | 0.856724106        |
| 4     | Cu <sub>2</sub> AgSb               | 0.935550658          | 0.738165268        | 0.856596502        |
| 5     | Cu <sub>2</sub> Ag <sub>2</sub> Te | 0.913987057          | 0.740313476        | 0.844517625        |
| 6     | CuAg <sub>2</sub> Te               | 0.908472776          | 0.740313476        | 0.841209056        |
| 7     | CuAgTe                             | 0.906361207          | 0.740313476        | 0.839942115        |
| 8     | CuBaBi                             | 0.854534964          | 0.816035545        | 0.839135197        |
| 9     | CuBaPb                             | 0.849410067          | 0.813318741        | 0.834973537        |
| 10    | CdBaPb                             | 0.872728526          | 0.775959128        | 0.834020767        |
| 11    | Ag <sub>3</sub> Bi                 | 0.897991985          | 0.733047280        | 0.832014103        |
| 12    | CuAg <sub>2</sub> Bi               | 0.889431996          | 0.742565560        | 0.830685421        |
| 13    | Cu <sub>2</sub> Ag <sub>2</sub> Bi | 0.888769184          | 0.742565560        | 0.830287735        |
| 14    | Cu <sub>2</sub> Ag <sub>2</sub> Sn | 0.892453591          | 0.735892421        | 0.829829123        |
| 15    | AgBaPb                             | 0.858660140          | 0.786076146        | 0.829626543        |
| 16    | Cu <sub>2</sub> AgTe               | 0.886818023          | 0.740313476        | 0.828216204        |
| 17    | SnBaHg                             | 0.880459882          | 0.749591464        | 0.828112515        |
| 18    | CuAg <sub>2</sub> Pb               | 0.879561948          | 0.741105962        | 0.824179553        |
| 19    | NaAuPb                             | 0.908942588          | 0.696784555        | 0.824079375        |
| 20    | Cu <sub>3</sub> Te                 | 0.885571465          | 0.728019723        | 0.822550768        |
| 21    | NiAg <sub>2</sub> Te               | 0.874563928          | 0.743676102        | 0.822208797        |
| 22    | MnPd <sub>2</sub> Te               | 0.865684786          | 0.755023050        | 0.821420092        |
| 23    | Cu <sub>2</sub> AsTe               | 0.877601435          | 0.736717322        | 0.821247790        |
| 24    | Cu <sub>2</sub> Pd <sub>2</sub> Te | 0.870217420          | 0.745028090        | 0.820141688        |
| 25    | SnBaAu                             | 0.863761034          | 0.753857899        | 0.819799780        |
| 26    | Cu <sub>2</sub> SbTe               | 0.870483451          | 0.741362984        | 0.818835264        |
| 27    | SrAu <sub>2</sub> Pb               | 0.864977481          | 0.749522740        | 0.818795585        |
| 28    | CuSrBi                             | 0.828777800          | 0.800976300        | 0.817657200        |
| 29    | GeBaPb                             | 0.820312925          | 0.813439214        | 0.817563441        |
| 30    | YAuPb                              | 0.868848784          | 0.739802378        | 0.817230222        |
| 31    | ZnBaPb                             | 0.817227116          | 0.816953588        | 0.817117704        |
| 32    | SrSnAu                             | 0.850561527          | 0.766468894        | 0.816924474        |
| 33    | Ag <sub>2</sub> SbAu               | 0.879333066          | 0.722856805        | 0.816742562        |
| 34    | Cu <sub>2</sub> Au <sub>2</sub> Bi | 0.874640091          | 0.728358257        | 0.816127357        |
| 35    | CaAuPb                             | 0.888472803          | 0.707581559        | 0.816116306        |
| 36    | SbBaAu                             | 0.859291250          | 0.750931752        | 0.815947451        |
| 37    | SrAgPb                             | 0.836212740          | 0.785160172        | 0.815791713        |
| 38    | CoAg <sub>2</sub> Te               | 0.862474386          | 0.745411640        | 0.815649288        |
| 39    | Ag <sub>2</sub> SnHg               | 0.882296590          | 0.714881235        | 0.815330448        |
| 40    | Cu <sub>2</sub> RhTe               | 0.863219343          | 0.743298700        | 0.815251086        |

*Continued on next page*

| S.No. | Formula                            | $P_{\text{Tabular}}$ | $P_{\text{CGCNN}}$ | $P_{\text{Joint}}$ |
|-------|------------------------------------|----------------------|--------------------|--------------------|
| 41    | Ca <sub>2</sub> Au <sub>2</sub> Pb | 0.886744822          | 0.707581559        | 0.815079516        |
| 42    | SnBaTl                             | 0.855584661          | 0.754161096        | 0.815015235        |
| 43    | CuAgSn                             | 0.867663063          | 0.735892421        | 0.814954806        |
| 44    | Ni <sub>2</sub> Ag <sub>2</sub> Sb | 0.862844115          | 0.741772521        | 0.814415477        |
| 45    | Ni <sub>2</sub> Ag <sub>2</sub> Sn | 0.864040544          | 0.739733750        | 0.814317826        |
| 46    | CuSrPb                             | 0.823116304          | 0.800206649        | 0.813952442        |
| 47    | Cu <sub>2</sub> AuPb               | 0.872224103          | 0.726058617        | 0.813757909        |
| 48    | NiAg <sub>2</sub> Sb               | 0.861383792          | 0.741772521        | 0.813539283        |
| 49    | Cu <sub>2</sub> SrPb               | 0.822015927          | 0.800206649        | 0.813292216        |
| 50    | PdBaPb                             | 0.824439130          | 0.796418130        | 0.813230730        |
| 51    | SrAuPb                             | 0.855303128          | 0.749522740        | 0.812990973        |
| 52    | SrSnHg                             | 0.845869311          | 0.762927753        | 0.812692688        |
| 53    | Cu <sub>2</sub> AgSn               | 0.863842080          | 0.735892421        | 0.812662217        |
| 54    | Ni <sub>2</sub> Ag <sub>2</sub> Bi | 0.855900648          | 0.747016281        | 0.812346901        |
| 55    | ZnSrPb                             | 0.823187145          | 0.796057332        | 0.812335219        |
| 56    | MnPd <sub>2</sub> Sb               | 0.850708997          | 0.754028347        | 0.812036737        |
| 57    | Na <sub>2</sub> Au <sub>2</sub> Pb | 0.888869995          | 0.696784555        | 0.812035819        |
| 58    | AgSbBa                             | 0.846081053          | 0.760775495        | 0.811958829        |
| 59    | Na <sub>2</sub> Au <sub>2</sub> Bi | 0.891204632          | 0.692852057        | 0.811863602        |
| 60    | Cu <sub>2</sub> AgBi               | 0.857689678          | 0.742565560        | 0.811640031        |
| 61    | Cu <sub>2</sub> AgPb               | 0.857405862          | 0.741105962        | 0.810885902        |
| 62    | Cu <sub>2</sub> AuBi               | 0.863978650          | 0.728358257        | 0.809730493        |
| 63    | Cu <sub>2</sub> HgBi               | 0.863577618          | 0.727151802        | 0.809007292        |
| 64    | SbTeBi                             | 0.855351795          | 0.739316285        | 0.808937591        |
| 65    | Cu <sub>2</sub> Hg <sub>2</sub> Bi | 0.863408461          | 0.727151802        | 0.808905798        |
| 66    | Cu <sub>2</sub> PdTe               | 0.851479617          | 0.745028090        | 0.808899006        |
| 67    | CuPd <sub>2</sub> Te               | 0.850981072          | 0.745028090        | 0.808599879        |
| 68    | AgSbAu <sub>2</sub>                | 0.865696952          | 0.722856805        | 0.808560893        |
| 69    | Cu <sub>2</sub> SnTe               | 0.854384988          | 0.739577889        | 0.808462149        |
| 70    | MgAuPb                             | 0.886398600          | 0.691365486        | 0.808385355        |
| 71    | Ge <sub>2</sub> TlBi               | 0.861351211          | 0.728750455        | 0.808310909        |
| 72    | Cu <sub>2</sub> TeBi               | 0.851848321          | 0.741852954        | 0.807850174        |
| 73    | Fe <sub>2</sub> Te <sub>2</sub> Bi | 0.849814866          | 0.744620624        | 0.807737169        |
| 74    | Ag <sub>3</sub> Pb                 | 0.859479545          | 0.730026561        | 0.807698352        |
| 75    | SrAu <sub>2</sub> Bi               | 0.842955251          | 0.753765124        | 0.807279200        |
| 76    | Sb <sub>2</sub> Bi                 | 0.856651476          | 0.733195613        | 0.807269131        |
| 77    | Si <sub>2</sub> TlBi               | 0.882474788          | 0.694343844        | 0.807222411        |
| 78    | SrAg <sub>2</sub> Pb               | 0.821821322          | 0.785160172        | 0.807156862        |
| 79    | NiAg <sub>2</sub> Bi               | 0.845708254          | 0.747016281        | 0.806231464        |
| 80    | BaAuBi                             | 0.883152098          | 0.690209982        | 0.805975251        |
| 81    | RhBaPb                             | 0.811497840          | 0.796464872        | 0.805484653        |
| 82    | SbBaAu <sub>2</sub>                | 0.841800499          | 0.750931752        | 0.805453000        |

*Continued on next page*

| S.No. | Formula                            | $P_{\text{Tabular}}$ | $P_{\text{CGCNN}}$ | $P_{\text{Joint}}$ |
|-------|------------------------------------|----------------------|--------------------|--------------------|
| 83    | CuPdSb <sub>2</sub>                | 0.846941518          | 0.743079972        | 0.805396900        |
| 84    | Cu <sub>3</sub> Bi                 | 0.853398680          | 0.733160871        | 0.805303556        |
| 85    | SrCdPb                             | 0.827878617          | 0.771408379        | 0.805290522        |
| 86    | CuPdTe                             | 0.845315719          | 0.745028090        | 0.805200668        |
| 87    | Ag <sub>2</sub> SnAu               | 0.862774908          | 0.718830547        | 0.805197164        |
| 88    | Cu <sub>2</sub> Rh <sub>2</sub> Te | 0.846444275          | 0.743298700        | 0.805186045        |
| 89    | Cu <sub>2</sub> Ag <sub>2</sub> Pb | 0.847902424          | 0.741105962        | 0.805183839        |
| 90    | Ni <sub>2</sub> AgSb               | 0.846775079          | 0.741772521        | 0.804774056        |
| 91    | BaBi                               | 0.799467476          | 0.810773909        | 0.803990049        |
| 92    | NiPd <sub>2</sub> Sb               | 0.841331262          | 0.746786362        | 0.803513302        |
| 93    | Cu <sub>2</sub> As <sub>2</sub> Te | 0.847512763          | 0.736717322        | 0.803194587        |
| 94    | CuAgSb                             | 0.846153266          | 0.738165268        | 0.802958067        |
| 95    | MnAg <sub>2</sub> Te               | 0.838434876          | 0.749329793        | 0.802792843        |
| 96    | CuSb <sub>2</sub> Au               | 0.845443302          | 0.738432324        | 0.802638911        |
| 97    | Ni <sub>2</sub> SrPb               | 0.798237870          | 0.809126937        | 0.802593497        |
| 98    | Cu <sub>2</sub> SbBi               | 0.843910158          | 0.740481603        | 0.802538736        |
| 99    | GeBaBi                             | 0.792932732          | 0.816115534        | 0.802205853        |
| 100   | Mg <sub>2</sub> Au <sub>2</sub> Bi | 0.877819810          | 0.687624042        | 0.801741503        |

Table S4: Software packages and computational tools used in forward and inverse discovery workflows.

| Tool / Library    | Version / Reference |
|-------------------|---------------------|
| Python            | 3.10                |
| NumPy             | 1.26.4              |
| pandas            | 2.x                 |
| SciPy             | 1.x                 |
| scikit-learn      | 1.x                 |
| XGBoost           | 2.x                 |
| LightGBM          | 4.x                 |
| CatBoost          | 1.x                 |
| PyTorch           | 2.1.2               |
| PyTorch Geometric | 2.7.0               |
| pymatgen          | 2024.x              |
| matminer          | 0.9.x               |
| tqdm              | 4.x                 |
| matplotlib        | 3.x                 |
| joblib            | 1.x                 |
| CUDA Toolkit      | 11.x (if GPU used)  |
| Anaconda          | 2023.x              |
